# Supplementary material for: Efficacy and Safety of Maxing Xianchang Su in the Treatment of Functional Constipation: A Randomized Controlled Trial
Source: Evid Based Complement Alternat Med. 2021 Nov 25;2021:3685440. doi: 10.1155/2021/3685440 (PMC8639258; doi:10.1155/2021/3685440)
Supplement: Supplementary Materials — Table S1: the SPIRIT checklist. Table S2: detailed data of security indicators. [file 3685440.f1.zip]

Archive with 2 entries (2 files):
- 3685440.f1/SPIRIT 2013 Checklist.docx
- 3685440.f1/Table S2Detailed data of security indicators..docx
